# Supplementary material for: Effects of triclopyr on the earthworm (Eisenia fetida) under laboratory conditions: assessment of growth inhibition and oxidative stress
Source: Royal Society of Chemistry journal article supplement (doi:10.1039/d6ra00908e), 2026-06-02
Supplement: d6ra00908e1.pdf [file d6ra00908e1.pdf]

***Supplementary Material***

**Effects of triclopyr on the earthworm (*Eisenia fetida*) under  
laboratory conditions: assessment of growth inhibition and  
oxidative stress**

Likun Wang <sup>a\*</sup>, Zhuzhu Gu <sup>a</sup>, Jiayao Luo <sup>a</sup>, Zixuan Qiu <sup>a</sup>

<sup>a</sup>Key Laboratory of Pollution Exposure and Health Intervention of Zhejiang Province,  
Interdisciplinary Research Academy, Zhejiang Shuren University, Hangzhou 310015, China

**Correspondences\*:** Likun Wang

Key Laboratory of Pollution Exposure and Health Intervention of Zhejiang Province,  
Interdisciplinary Research Academy, Zhejiang Shuren University, Hangzhou 310015, China

Email: wanglikun@zjsru.edu.cn

**Table S1. Summary of growth parameters and biomarker responses in *Eisenia fetida* exposed to triclopyr.**

| Parameter                            | Time (d) | CK                        | 0.1 mg kg <sup>-1</sup>   | 0.5 mg kg <sup>-1</sup>   | 1.0 mg kg <sup>-1</sup>   | 5.0 mg kg <sup>-1</sup>   | 10.0 mg kg <sup>-1</sup>  |
|--------------------------------------|----------|---------------------------|---------------------------|---------------------------|---------------------------|---------------------------|---------------------------|
| GIR (%)                              | 7        | -3.16±1.35 <sup>ab</sup>  | -3.80±1.66 <sup>b</sup>   | -3.43±0.98 <sup>ab</sup>  | -4.82±2.46 <sup>b</sup>   | 0.40±3.48 <sup>a</sup>    | 0.25±2.15 <sup>a</sup>    |
|                                      | 14       | -7.79±2.87 <sup>b</sup>   | -8.02±1.53 <sup>b</sup>   | -8.01±1.59 <sup>b</sup>   | -9.65±1.81 <sup>b</sup>   | -1.99±2.06 <sup>a</sup>   | -2.79±2.34 <sup>a</sup>   |
|                                      | 21       | -4.22±0.98 <sup>b</sup>   | -4.73±1.97 <sup>b</sup>   | -4.33±3.93 <sup>b</sup>   | -4.91±2.72 <sup>b</sup>   | 5.49±2.75 <sup>a</sup>    | 3.20±2.50 <sup>a</sup>    |
|                                      | 28       | 1.38±2.44 <sup>b</sup>    | 0.17±1.65 <sup>b</sup>    | 2.37±2.04 <sup>b</sup>    | 3.45±1.27 <sup>b</sup>    | 10.98±1.86 <sup>a</sup>   | 13.14±2.96 <sup>a</sup>   |
| SGR                                  | 0-7      | 0.0044±0.0019             | 0.0053±0.0023             | 0.0048±0.0014             | 0.0067±0.0034             | -0.0006±0.0050            | -0.0004±0.0031            |
|                                      | 7-14     | 0.0062±0.0045             | 0.0057±0.0006             | 0.0062±0.0018             | 0.0064±0.0057             | 0.0034±0.0067             | 0.0043±0.0062             |
|                                      | 14-21    | -0.0048±0.0051            | -0.0044±0.0044            | -0.0050±0.0050            | -0.0063±0.0032            | -0.0109±0.0015            | -0.0086±0.0029            |
|                                      | 21-28    | -0.0079±0.0034            | -0.0068±0.0047            | -0.0094±0.0058            | -0.0118±0.0042            | -0.0085±0.0051            | -0.0155±0.0037            |
| ROS (Fluorescence intensity/mg prot) | 7        | 325±14 <sup>e</sup>       | 382±13 <sup>d</sup>       | 405±8 <sup>c</sup>        | 434±11 <sup>b</sup>       | 451±11 <sup>b</sup>       | 473±11 <sup>a</sup>       |
|                                      | 14       | 351±13 <sup>d</sup>       | 371±11 <sup>d</sup>       | 412±16 <sup>c</sup>       | 408±13 <sup>c</sup>       | 438±11 <sup>b</sup>       | 462±14 <sup>a</sup>       |
|                                      | 21       | 335±10 <sup>d</sup>       | 345±13 <sup>d</sup>       | 366±8 <sup>c</sup>        | 384±13 <sup>c</sup>       | 413±15 <sup>b</sup>       | 444±13 <sup>a</sup>       |
|                                      | 28       | 337±10 <sup>c</sup>       | 342±12 <sup>bc</sup>      | 355±9 <sup>ab</sup>       | 358±4 <sup>ab</sup>       | 355±12 <sup>b</sup>       | 371±4 <sup>a</sup>        |
| MDA (nmol/mg prot)                   | 7        | 0.351±0.041 <sup>d</sup>  | 0.389±0.029 <sup>d</sup>  | 0.947±0.055 <sup>c</sup>  | 0.975±0.080 <sup>bc</sup> | 1.084±0.139 <sup>b</sup>  | 1.364±0.057 <sup>a</sup>  |
|                                      | 14       | 0.428±0.044 <sup>e</sup>  | 0.589±0.027 <sup>d</sup>  | 0.838±0.037 <sup>c</sup>  | 0.900±0.088 <sup>c</sup>  | 1.101±0.150 <sup>b</sup>  | 1.337±0.074 <sup>a</sup>  |
|                                      | 21       | 0.408±0.040 <sup>c</sup>  | 0.532±0.070 <sup>d</sup>  | 0.714±0.089 <sup>c</sup>  | 0.792±0.077 <sup>c</sup>  | 1.144±0.079 <sup>b</sup>  | 1.476±0.045 <sup>a</sup>  |
|                                      | 28       | 0.385±0.028 <sup>d</sup>  | 0.434±0.060 <sup>cd</sup> | 0.440±0.023 <sup>cd</sup> | 0.499±0.034 <sup>c</sup>  | 0.790±0.073 <sup>b</sup>  | 0.978±0.069 <sup>a</sup>  |
| SOD (U/mg prot)                      | 7        | 1.244±0.023 <sup>d</sup>  | 1.493±0.111 <sup>c</sup>  | 1.600±0.168 <sup>bc</sup> | 1.723±0.058 <sup>b</sup>  | 1.835±0.079 <sup>b</sup>  | 2.101±0.110 <sup>a</sup>  |
|                                      | 14       | 1.148±0.075 <sup>c</sup>  | 1.389±0.041 <sup>d</sup>  | 1.538±0.071 <sup>c</sup>  | 1.653±0.111 <sup>b</sup>  | 1.724±0.084 <sup>b</sup>  | 1.891±0.029 <sup>a</sup>  |
|                                      | 21       | 1.151±0.126 <sup>b</sup>  | 1.219±0.082 <sup>b</sup>  | 1.206±0.062 <sup>b</sup>  | 1.091±0.090 <sup>b</sup>  | 1.386±0.075 <sup>a</sup>  | 1.510±0.075 <sup>a</sup>  |
|                                      | 28       | 0.938±0.052 <sup>b</sup>  | 1.163±0.132 <sup>a</sup>  | 0.983±0.107 <sup>ab</sup> | 1.079±0.133 <sup>ab</sup> | 0.984±0.140 <sup>ab</sup> | 1.131±0.041 <sup>ab</sup> |
| CAT (U/mg prot)                      | 7        | 2.718±0.095 <sup>d</sup>  | 3.552±0.238 <sup>c</sup>  | 4.061±0.420 <sup>b</sup>  | 4.339±0.277 <sup>b</sup>  | 4.501±0.101 <sup>b</sup>  | 5.122±0.198 <sup>a</sup>  |
|                                      | 14       | 2.696±0.249 <sup>c</sup>  | 2.661±0.093 <sup>c</sup>  | 2.713±0.343 <sup>c</sup>  | 3.210±0.155 <sup>b</sup>  | 3.405±0.193 <sup>ab</sup> | 3.726±0.298 <sup>a</sup>  |
|                                      | 21       | 2.391±0.152 <sup>d</sup>  | 2.491±0.157 <sup>c</sup>  | 2.530±0.112 <sup>cd</sup> | 2.759±0.240 <sup>c</sup>  | 3.083±0.169 <sup>b</sup>  | 3.425±0.162 <sup>a</sup>  |
|                                      | 28       | 2.620±0.056 <sup>b</sup>  | 2.583±0.039 <sup>b</sup>  | 2.604±0.099 <sup>b</sup>  | 2.600±0.137 <sup>b</sup>  | 2.806±0.073 <sup>a</sup>  | 2.859±0.099 <sup>a</sup>  |
| POD (U/mg prot)                      | 7        | 2.182±0.105 <sup>d</sup>  | 3.330±0.073 <sup>c</sup>  | 3.505±0.146 <sup>c</sup>  | 3.503±0.060 <sup>c</sup>  | 4.268±0.263 <sup>b</sup>  | 4.577±0.122 <sup>a</sup>  |
|                                      | 14       | 2.492±0.053 <sup>d</sup>  | 2.421±0.077 <sup>d</sup>  | 2.543±0.142 <sup>cd</sup> | 2.695±0.057 <sup>c</sup>  | 3.016±0.100 <sup>b</sup>  | 3.242±0.049 <sup>a</sup>  |
|                                      | 21       | 2.430±0.098 <sup>a</sup>  | 2.488±0.088 <sup>a</sup>  | 2.395±0.052 <sup>ab</sup> | 2.344±0.095 <sup>ab</sup> | 2.274±0.042 <sup>b</sup>  | 2.270±0.119 <sup>b</sup>  |
|                                      | 28       | 2.528±0.184 <sup>b</sup>  | 2.760±0.063 <sup>a</sup>  | 2.766±0.102 <sup>a</sup>  | 2.548±0.090 <sup>b</sup>  | 2.514±0.051 <sup>b</sup>  | 2.738±0.106 <sup>ab</sup> |
| GST (U/mg prot)                      | 7        | 0.163±0.007 <sup>d</sup>  | 0.165±0.008 <sup>d</sup>  | 0.188±0.007 <sup>c</sup>  | 0.230±0.009 <sup>b</sup>  | 0.250±0.016 <sup>a</sup>  | 0.255±0.010 <sup>a</sup>  |
|                                      | 14       | 0.171±0.007 <sup>c</sup>  | 0.167±0.008 <sup>c</sup>  | 0.181±0.008 <sup>c</sup>  | 0.219±0.012 <sup>b</sup>  | 0.252±0.015 <sup>a</sup>  | 0.253±0.010 <sup>a</sup>  |
|                                      | 21       | 0.155±0.008 <sup>bc</sup> | 0.145±0.008 <sup>c</sup>  | 0.161±0.015 <sup>bc</sup> | 0.168±0.013 <sup>ab</sup> | 0.152±0.011 <sup>bc</sup> | 0.183±0.006 <sup>a</sup>  |
|                                      | 28       | 0.144 ±0.010 <sup>a</sup> | 0.145±0.005 <sup>a</sup>  | 0.152±0.004 <sup>a</sup>  | 0.152±0.013 <sup>a</sup>  | 0.141±0.011 <sup>a</sup>  | 0.146±0.010 <sup>a</sup>  |

Data are presented as mean ± SD. Different lowercase letters within each row indicate significant differences ( $p < 0.05$ , Fisher's LSD test).  $n = 3$  replicates per treatment.
